# Supplementary material
Source: publisher figshare collection journal article supplement (https://frontiersin.figshare.com/ndownloader/files/23867555)
Supplement: Supplementary file 1 [file 23867555]

**Supplementary Material I: Visitor survey**

On a scale of 1 (strongly disagree) to 10 (strongly agree) could you please indicate how strongly you agree or disagree with each of the following statements. Please note that there is no mid-point; a ‘5’ suggests that you “slightly disagree” with the statement while a ‘6’ suggests that you “slightly agree” with the statement. If you are not sure please put a ‘0’. If you prefer NOT to answer a question, please leave the response blank.

*Understanding of the Ningaloo Coast World Heritage Area (WHA)*

1. I am aware that the Ningaloo Coast is a WHA___
2. I am aware of the boundaries of the Ningaloo Coast WHA___
3. I am aware which authorities are responsible for managing the Ningaloo Coast WHA___
4. I understand the rules and regulations associated with the WHA___
5. I believe that the Ningaloo Coast deserves to be a World Heritage Area___

[If answered 6 or above in response to (e)] In a few words, please describe the features of the region that you think led to it becoming a World Heritage Area?

In the next section of the survey, I am going to ask you some questions about the Ningaloo Coast World Heritage Area. Before I do, I would like to read you a short statement that is used to describe the region.

*<<Message here>>*

*Importance of the Ningaloo Coast World Heritage Area (WHA)*

1. The WHA designation is my main reason for visiting the region___
2. I would have visited the Ningaloo Coast even if it was not a WHA___
3. The sustainable management of the WHA is important to me___
4. Preserving the cultural heritage of the Ningaloo Coast World Heritage Area is important to me___

*Status of the Ningaloo Coast World Heritage Area (WHA)*

1. Since visiting in the region, I believe that the WHA is in good condition___
2. The Ningaloo Coast WHA lived up to my expectations for visiting___
3. Based on my visit, I am optimistic about the future of the WHA___
4. Based on my visit, I think that the Ningaloo coast WHA is well managed___

*Potential threats to the Ningaloo Coast World Heritage Area (WHA)*

1. I am concerned that increasing tourism could threaten the condition of the Ningaloo Coast WHA___
2. I am concerned that climate change could threaten the condition of the Ningaloo Coast WHA___
3. I am concerned that pollution (e.g. from plastics) could threaten the condition of the Ningaloo Coast WHA___
4. I am concerned that the offshore oil and gas industry could threaten the condition of the Ningaloo Coast WHA___
5. I am concerned about the marine environment (flora and fauna) in the Ningaloo Coast WHA___
6. I am concerned about the Karst system and underground caves in the Ningaloo Coast WHA___
7. I am concerned about the terrestrial environment (flora and fauna) in the Ningaloo Coast WHA___

*Importance of behavioural aspects associated with the Ningaloo Coast World Heritage Area (WHA)*

1. I believe that most *residents* of the region behave in an environmentally responsible way in the Ningaloo Coast WHA___
2. I believe that most *visitors* to the region behave in an environmentally responsible way in the Ningaloo Coast WHA___

*Past behaviour associated with the Ningaloo Coast World Heritage Area (WHA)*

1. I behaved in an environmentally responsible way while in the Ningaloo Coast WHA___
2. I encouraged others (for example, my friends/family) to engage in an environmentally responsible way while visiting the Ningaloo Coast WHA___
3. While visiting the region, I have never littered in the Ningaloo Coast WHA___
4. While visiting the region, if I saw litter in the Ningaloo Coast WHA, I always picked it up___
5. While visiting the region, I never interfered with animals (marine or terrestrial) in the Ningaloo Coast WHA___
6. While visiting the region, I never went off marked roads and paths (either in cars or walking) in the Ningaloo Coast WHA___

*Behavioural intentions associated with the Ningaloo Coast World Heritage Area (WHA)*

1. I will minimise the impacts that my actions have on the condition of the Ningaloo Coast WHA___
2. I will try to influence the behaviour of other visitors to make sure they behave in an environmentally responsible way___
3. I have the ability to help protect the Ningaloo Coast WHA___
4. I will take action to try and make sure Ningaloo Coast WHA remains well protected ___
5. I will find a way to communicate the importance of using the Ningaloo Coast WHA responsibly___

*Before visiting - Accessing information about the Ningaloo Coast World Heritage Area (WHA)*

1. Before visiting the region, I actively tried to find information about the Ningaloo Coast WHA___
2. While looking for information before my visit, I found good information about the Ningaloo Coast WHA___
3. Before my visit, it was easy to find information about the Ningaloo Coast WHA ___

If answered ‘6’ or above to statement ‘jj’: in a few words, please describe the types of information you searched for about the Ningaloo WHA?

*While visiting - Accessing information about the Ningaloo Coast World Heritage Area (WHA)*

1. Since arriving, I have had access to good information about the Ningaloo Coast WHA___
2. Since arriving, information about the Ningaloo Coast WHA has been easy to find___
3. I would like to know more about the Ningaloo Coast WHA___

If answered ‘6’ or above to statement ‘q’: in a few words, please describe the types of information that you would like to know about the Ningaloo WHA?

In the following questions, please indicate your response by placing a ‘tick’ in the box that corresponds to your response. Please note that you can select as many boxes as are applicable. For each of your selected options, please then indicate how much you TRUST that information source on a scale of 1 (Not trusted at all) to 5 (completely trust).

1. Before visiting the region, I searched for information about the Ningaloo Coast WHA from:

| Information source | Level of trust (scored 1-5) | Comments (e.g. which website, which social media platform, which documentary, which visitor centre, etc.) |
| --- | --- | --- |
| □ Website |  |  |
| □ Social Media |  |  |
| □ Friends |  |  |
| □ Family |  |  |
| □ Visitor Centre |  |  |
| □ Signs about the WHA |  |  |
| □ TV/documentary |  |  |
| □ Other (please specify) |  |  |

1. Since arriving in the region, I have learnt more about the Ningaloo Coast WHA from:

| Information source | Level of trust (scored 1-5) | Comments (e.g. which website, which social media platform, which documentary, which visitor centre, etc.) |
| --- | --- | --- |
| □ Website |  |  |
| □ Social Media |  |  |
| □ Friends |  |  |
| □ Family |  |  |
| □ Visitor Centre |  |  |
| □ Signs about the WHA |  |  |
| □ TV/documentary |  |  |
| □ Other (please specify) |  |  |

*Demographics:*

1. Country of origin (If Australia, ask for town):
2. Length of visit (in days):
3. Travelling with: solo/partner/friends/family
4. Gender:
5. Age:

Thank you for taking part in this survey. Just to finish up, I would like to read again the statement that I read earlier to describe the region and ask you two quick questions:

*<<Message here>>*

On a scale of 1 (strongly disagree) to 10 (strongly agree) could you please indicate how strongly you agree or disagree with each of the following statement.

1. This statement is a good way of describing the region and the World Heritage Area___
2. This statement reflects how I would describe the region and World Heritage Area to my family and friends___

Finally, in your opinion, what is the most important contribution of the Ningaloo Coast World Heritage Area: Environmental, Economic or Social?
